# Supplementary material for: Operando and in situ Raman studies of alumina-supported vanadium phosphatecatalysts in propane ammoxidation reaction: activity, selectivity and active phase formation
Source: Royal Society of Chemistry journal article supplement (doi:10.1039/c1cp22608h), 2011-10-12
Supplement: c1cp22608h.pdf [file c1cp22608h.pdf]

### Supplementary information

*Operando and in-situ Raman Studies of alumina-supported vanadium phosphate catalysts in propane ammoxidation reaction: Activity, selectivity and active phase formation*

E. Mikolajska, S. B. Rasmussen, A. E. Lewandowska, M. A. Bañares

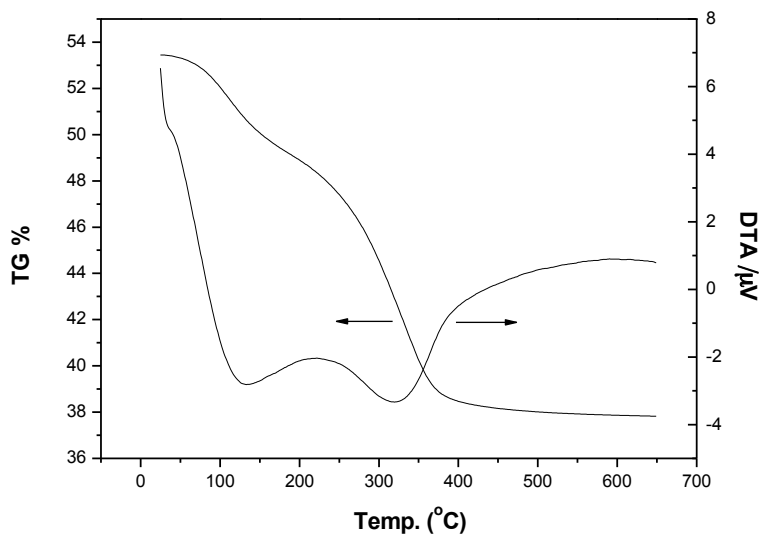

Figure S1 TG/DTG analysis of P8V8.8P/Al

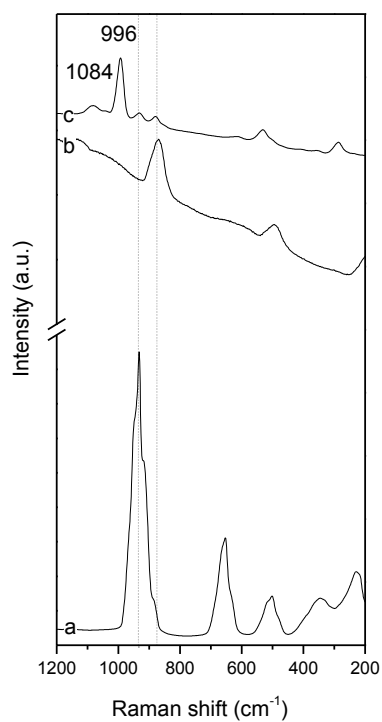

Figure S2 Raman spectra of a:  $\text{NH}_4\text{VO}_3$ , b:  $(\text{COOH})_2$ , c: P8V8.8P/Al
